# Supplementary material
Source: MDPI journal article supplement (https://www.mdpi.com/2311-7524/7/12/544)
Supplement: s1 [file s1]

## Supplemental tables and figures

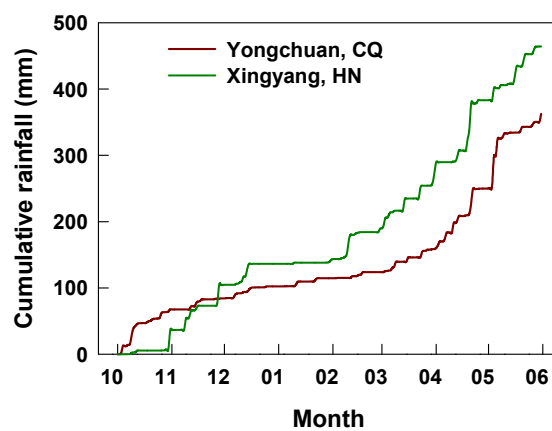

Figure S1. Cumulative rainfall from October 1 to May 30 at Yongchuan, Chongqing (CQ) and Xingyang, Henan (HN) province, China.

Table S1. Total N concentration of fibrous roots and mature leaves measured 15 days after  $^{15}\text{N}$  application (DAA15), on the days of the first harvest (DFH) and post-harvest (DPH) of young spring shoots at Yongchuan (March 16 and May 4) and Xingyang (April 8 and May 12).

| Fertilization date | Root         |              |               | Leaf          |               |               |
|--------------------|--------------|--------------|---------------|---------------|---------------|---------------|
|                    | DAA15        | DFH          | DPH           | DAA15         | DFH           | DPH           |
| Yongchuan          |              |              |               |               |               |               |
| October 21         | 20.4         | 24.7         | 20.5          | 24.7          | 23.8          | 31.6          |
| November 25        | 20.3         | 22.3         | 20.1          | 25.5          | 23.6          | 32.8          |
| December 25        | 19.6         | 19.6         | 18.0          | 24.0          | 24.5          | 32.5          |
| January 14         | 23.5         | 21.0         | 17.8          | 24.7          | 24.5          | 31.9          |
| February 1         | 20.8         | 20.3         | 18.7          | 25.4          | 25.0          | 32.2          |
| Oct.21+Jan.01      | 20.1         | 25.9         | 18.1          | 25.4          | 25.1          | 31.6          |
| Mean               | 20.8 $\beta$ | 22.3 $\beta$ | 18.8 $\alpha$ | 25.0 $\alpha$ | 24.4 $\alpha$ | 32.1 $\beta$  |
| Xingyang           |              |              |               |               |               |               |
| October 24         | 18.5         | 23.2b        | 16.9          | 29.4          | 28.6          | 24.0          |
| November 25        | 21.6         | 20.3ab       | 15.3          | 28.3          | 27.9          | 23.8          |
| December 25        | 18.7         | 18.3a        | 15.2          | 27.4          | 27.1          | 23.7          |
| January 14         | 21.6         | 19.4a        | 15.5          | 27.8          | 28.2          | 23.7          |
| February 20        | 24.0         | 17.9a        | 13.6          | 30.0          | 27.9          | 23.8          |
| Oct.24+Jan.14      | 21.8         | 20.6ab       | 15.1          | 31.8          | 28.4          | 23.5          |
| Mean               | 21.0 $\beta$ | 20.0 $\beta$ | 15.3 $\alpha$ | 29.1 $\beta$  | 28.0 $\beta$  | 23.8 $\alpha$ |

Different English letters following data of the same column at each location indicate significant ( $p < 0.05$ ) differences among fertilization dates, respectively. Different Greek letters following data indicate significant differences among means of DAA15, DFH, and DPH across fertilization dates.
